**Community-level facilitation by macroalgal foundation species peaks at an  
intermediate level of environmental stress**

Ricardo A. Scrosati

St. Francis Xavier University, Department of Biology, Antigonish, Nova Scotia B2G 2W5,  
Canada

E-mail: [rscrosat@stfx.ca](mailto:rscrosat@stfx.ca)

## Abstract

This paper examines how community-level facilitation by macroalgal foundation species changes with environmental stress. In rocky intertidal habitats, abiotic stress (mainly due to desiccation and thermal extremes during low tides) increases sharply with elevation because of tide dynamics. A previous study done on the Atlantic coast of Nova Scotia (Canada) showed that, at low elevations, where conditions are benign because low tides are brief, fucoid algal canopies (*Ascophyllum nodosum* and *Fucus* spp.) do not affect the structure of benthic communities. However, at middle and high elevations, where low tides last longer, fucoid canopies limit abiotic extremes near the substrate and, in that way, increase the richness of benthic communities. Richness was measured as the number of benthic algal (except fucoids) and invertebrate species found in replicate quadrats. Using the published data from that study, the present study compares the intensity of facilitation and its importance (relative to all other sources of variation in richness) between middle and high elevations, which represent intermediate and high stress, respectively. Facilitation intensity was calculated as the percent increase in benthic richness between quadrats with low canopy cover and quadrats with high canopy cover, while the importance of facilitation was calculated as the percentage of observed variation in richness that was explained by canopy cover. Data for a total of 688 quadrats surveyed along 350 km of coastline were used. The analyses revealed that both the intensity and importance of facilitation were greater at middle elevations than at high elevations. As canopies were previously found not to affect benthic communities at low elevations, this study indicates that the facilitation–stress relationship viewed at the community level is unimodal for this marine system. Such a trend was already found for some terrestrial systems involving canopy-forming plants as foundation species. Thus, this unimodal pattern may be ubiquitous in nature and, as further studies refine it, might help to predict community-level facilitation depending on environmental stress.

## Introduction

In ecology, facilitation refers to the improvement of species performance caused directly or indirectly by another species (Bruno et al. 2003, Bulleri et al. 2016, Michalet & Pugnaire 2016). Common facilitators are organisms that ameliorate abiotic conditions in environmentally stressful habitats. Examples are alpine cushion plants, which protect smaller plants from cold and wind (Ballantyne & Pickering 2015), desert shrubs, which locally decrease heat and water loss (Pugnaire et al. 2011, Ruttan et al. 2016), and intertidal algae, which limit benthic thermal stress and desiccation at low tide (Bertness et al. 1999, Beermann et al. 2013). The possession of extensive canopies is central to the ability of such species to positively affect others. Because of their influence on entire communities through those mechanisms, those organisms are often referred to as foundation species (Altieri & van de Koppel 2014).

The intensity of facilitation by canopy-forming species depends on the degree of environmental stress. Studies in aquatic and terrestrial communities have consistently found that positive effects are common under abiotically stressful conditions but weak or absent under benign conditions (He et al. 2013). That is a central component of the stress gradient hypothesis (Bertness & Callaway 1994), which has frequently been used to assume a continuous increase in facilitation intensity with abiotic stress (Maestre et al. 2009). More recent studies have begun to evaluate if the intensity of facilitation may actually often have a unimodal relationship with stress, especially if facilitation is evaluated at the community level (Michalet et al. 2006, Brooker et al. 2008, Holmgren & Scheffer 2010). An important reason for such a pattern could be that, under extreme stress, facilitators may be unable to ameliorate conditions strongly enough for many species (Holmgren & Scheffer 2010, He & Bertness 2014, Michalet et al. 2014). This paper investigates the facilitation–stress relationship at the community level using data from rocky intertidal systems.

The intertidal zone is the area of the coast between the highest and lowest tidal levels. As low tides become longer with intertidal elevation, biological desiccation and thermal extremes increase with elevation because of the longer exposure to the air (Raffaelli & Hawkins 1999, Menge & Branch 2001). For example, in the summer on cold-temperate shores, daily maximum temperature can be 10 °C higher and algal desiccation during low tides four times higher at high elevations than at low elevations (Eckersley & Scrosati 2012). On NW Atlantic rocky shores,

furoid seaweed canopies (*Ascophyllum nodosum* and *Fucus* spp.) often cover the substrate extensively from low to high elevations in wave-sheltered habitats (Adey & Hayek 2005, Longtin et al. 2009; Fig. 1). Due to the limited aerial exposure at low elevations, furoid canopies in such places have almost no influence on benthic temperature and do not affect the structure of benthic communities. However, with the longer aerial exposure at high and middle elevations, furoid canopies limit the otherwise high thermal extremes and, in that way, increase the richness (number of species) of benthic communities (Watt & Scrosati 2013). As furoid canopies do not affect benthic richness at low elevations, this paper evaluates the occurrence of a unimodal facilitation–stress relationship by testing the hypothesis that the positive effect of canopies on benthic richness is greater at middle elevations than at high elevations.

## Materials and methods

This study uses the published data set (Watt & Scrosati 2014) that was produced by a mensurative experiment to show that furoid canopies increase benthic richness at high and middle elevations while having no effects at low elevations (Watt & Scrosati 2013). The methodology of that study is described in the corresponding paper (Watt & Scrosati 2013), but it is summarized here to highlight the main aspects. The data were measured in wave-sheltered rocky intertidal habitats spanning 350 km of the Atlantic coast of Nova Scotia, Canada. These canopies have a similar composition of furoid algae (Fucaceae) at low (0–0.5 m above chart datum), middle (0.5–1 m), and high (1–1.5 m) elevations, with a predominance of *Ascophyllum nodosum* (59–72 %) followed by *Fucus vesiculosus* (26–34 %) and three other species of *Fucus* (< 1–7 %). To assess whether canopy effects on benthic richness existed at each elevation zone, all algae and invertebrates found in replicate quadrats (20 cm x 20 cm) randomly placed at each zone were identified. For each elevation zone, canopy effects were looked for by comparing richness between two canopy cover treatments: low (0–40 %) and high (60–100 %) cover. Since furoid canopies only affected richness at high and middle elevations (Watt & Scrosati 2013), only data for such elevations were necessary to test the hypothesis of the present study. The number of surveyed quadrats was 233 (low canopy cover) and 110 (high canopy cover) for high elevations and 111 (low canopy cover) and 234 (high canopy cover) for middle elevations. For these two elevation zones, a total of 16 seaweeds (excluding the furoid species) and 41 invertebrates were identified (Watt & Scrosati 2013).

In this study, both the intensity and importance (Brooker et al. 2008) of whole-community facilitation by furoid canopies are compared between high and middle elevations. Facilitation intensity was calculated for each elevation zone as the percent increase in richness between the low-cover and high-cover treatments. For high elevations, the 110 high-cover quadrats were randomly paired with 110 low-cover quadrats selected at random while, for low elevations, the 111 low-cover quadrats were randomly paired with 111 high-cover quadrats also selected at random. For each resulting pair of quadrats, the percent change in richness was calculated as  $\{[(S_H - S_L)/S_L]*100\}$ , where  $S_H$  was species richness in the high-cover quadrat and  $S_L$  was richness in the low-cover quadrat. Thus calculated, facilitation intensity was compared between high and middle elevations through a two-sample *t*-test (Howell 2002). The importance of facilitation was calculated for each elevation zone using the point-biserial correlation coefficient ( $r_{pb}$ ). To calculate  $r_{pb}$  for each zone, richness was considered as the dependent variable and the two canopy cover treatments were considered as the independent variable, coding low cover as "1" and high canopy cover as "2" (Fritz et al. 2012). The percent  $r_{pb}^2$  was calculated to indicate the percentage of variation in richness that could be explained by canopy cover, which was considered as the importance of whole-community facilitation ( $r_{pb}$  being positive) relative to all other sources of variation in richness. The point-biserial correlation coefficient was compared between high and middle elevations using the *Z* test designed to compare two independent *r* values (Howell 2002). These analyses tested the hypothesis of this study at the patch (quadrat) scale. The difference in facilitation intensity between both elevation zones was also evaluated at the whole-habitat scale (Cavieres et al. 2016), for which the total number of species found only under high canopy cover, only under low cover, and in both cover treatments (Armas et al. 2011) was calculated for middle and high elevations using the information provided in Table 2 in Watt and Scrosati (2013).

## Results

At the patch scale, the intensity of community-level facilitation by furoid canopies was, on average, 36 % higher at middle elevations than at high elevations, which was a significant difference ( $t_{219} = 2.25$ ,  $P = 0.026$ ; Fig. 2A). The importance of facilitation was also higher at middle elevations, as furoid canopy cover explained 49 % (percent  $r_{pb}^2$ ) of the observed variation in benthic richness at middle elevations and 38 % at high elevations. The point-biserial correlation coefficient ( $r_{pb}$ ) was significantly higher at middle elevations than at high elevations

( $Z = 1.88$ ,  $P = 0.030$ ; Fig. 2B). At the whole-habitat scale, 26 of the 57 species (46 %) identified at middle elevations were only present under high canopy cover, while no species (0 %) were only present under low cover. At high elevations, however, just 11 of the identified 30 species (37 %) were only present under high canopy cover, while 3 of those 30 species (10 %) were only present under low cover.

## Discussion

A recent study (Watt & Scrosati 2013) found that intertidal furoid canopies increase benthic species richness at middle and high elevations. The present study has revealed that such effects are greater at middle elevations in terms of both intensity and importance. As furoid canopies have no effects on benthic communities at low elevations (Watt & Scrosati 2013), these findings support the unimodal facilitation–stress hypothesis (Michalet et al. 2006, Holmgren & Scheffer 2010). In other words, community-level facilitation by intertidal furoid canopies peaks at an intermediate level of environmental stress represented by middle elevations.

A variety of mechanisms have been proposed to explain the drop in facilitation intensity from intermediate to high stress levels (Michalet & Pugnaire 2016). When effects are analyzed at the community level (as in this study), a commonly proposed mechanism is the decreasing ability of facilitators to improve conditions strongly enough for some species towards the highest stress levels where the facilitators occur (Holmgren & Scheffer 2010, He & Bertness 2014, Michalet et al. 2014). For intertidal communities as a whole, physiological stress (mainly due to high temperature and desiccation during low tides) peaks at high elevations (Raffaelli & Hawkins 1999, Menge & Branch 2001). However, at high elevations, furoid canopies were found to be unable to limit mean temperature as strongly as at middle elevations (Watt & Scrosati 2013). Thus, these observations lend support to the above explanation. Studies on the physiological influence of furoid canopies on the benthic species found at high and middle elevations (currently lacking) could contribute to strengthen this view.

Another explanation for facilitation decreasing at high stress relates to structural changes in the facilitators. For example, Bonanomi et al. (2016) found a hump-shaped relationship between altitude on mountain sides (proxy for cold and wind stress) and the intensity of facilitation by cushion plants on associated plant richness. The decreasing facilitation at high altitudes seemed to result mainly from an increase in cushion compactness, which may have limited the ability of

cushions to trap seeds of other plants and/or enable their root development (Bonanomi et al. 2016). This was not the case for intertidal furoid canopies, however. These canopies are extensive but do not increase in compactness towards high elevations. Moreover, the canopies arise from relatively small holdfasts (the structures that keep algae attached to the substrate), leaving ample substrate for other benthic species to occur.

Another proposed explanation for the decrease in facilitation at high stress involves increasing competition. For example, when stress peaks due to intense water loss in the soil, canopy-forming plants may actually compete for water with the associated plants, which can limit or even eliminate facilitation (Holmgren et al. 2012, Michalet et al. 2014, Butterfield et al. 2016). However, this scenario is not applicable to the studied intertidal habitats, because benthic algae and sessile invertebrates are attached to solid bedrock in these places.

Regardless of the underlying mechanism, decreases in facilitation intensity from intermediate to high stress levels have been found for additional systems recently (de Bello et al. 2011, Koyama & Tsuyuzaki 2013, Castanho et al. 2015). Overall, these findings point to the more complex nature of the facilitation–stress relationship than originally envisioned. In this sense, the contribution of the present study is important because it is based on data for the entire community, including primary producers and consumers. This is relevant because most facilitation studies have investigated effects on a few associated species or, when looking at the multispecies level, often only on the assemblage of associated plants (Soliveres et al. 2015, Bonanomi et al. 2016, Cavieres et al. 2016, López et al. 2016). Recent studies are recognizing the need to evaluate facilitation effects at the whole-community level, including plants and animals, to develop a broader conceptual understanding of the facilitation–stress relationship (Ruttan et al. 2016, Lortie et al. 2016).

## References

- Adey WH, Hayek LC. 2005.** The biogeographic structure of the western North Atlantic rocky intertidal. *Cryptogamie: Algologie* **26**:35–66
- Altieri AH, van de Koppel J. 2014.** Foundation species in marine ecosystems. In: Bertness MD, Bruno JF, Silliman BR, Stachowicz JJ, eds. *Marine community ecology and conservation*. Sunderland: Sinauer, 37–56.



- 182 **Armas C, Rodríguez-Echeverría S, Pugnaire FI. 2011.** A field test of the stress-gradient  
183 hypothesis along an aridity gradient. *Journal of Vegetation Science* **22**:818–827
- 184 **Ballantyne M, Pickering CM. 2015.** Shrub facilitation is an important driver of alpine plant  
185 community diversity and functional composition. *Biodiversity and Conservation* **24**:1859–1875
- 186 **Beermann AJ, Ellrich JA, Molis M, Scrosati RA. 2013.** Effects of seaweed canopies and adult  
187 barnacles on barnacle recruitment: the interplay of positive and negative influences. *Journal of*  
188 *Experimental Marine Biology and Ecology* **448**:162–170
- 189 **Bertness MD, Callaway R. 1994.** Positive interactions in communities. *Trends in Ecology &*  
190 *Evolution* **9**:191–193
- 191 **Bertness MD, Leonard GH, Levine JM, Schmidt PR, Ingraham AO. 1999.** Testing the  
192 relative contribution of positive and negative interactions in rocky intertidal communities.  
193 *Ecology* **80**:2711–2726
- 194 **Bonanomi G, Stinca A, Battista Chirico G, Ciaschetti G, Saracino A, Incerti G. 2016.**  
195 Cushion plant morphology controls biogenic capability and facilitation effects of *Silene acaulis*  
196 along an elevation gradient. *Functional Ecology* **30**:1216–1226
- 197 **Brooker RW, Maestre FT, Callaway RM, Lortie CL, Cavieres LA, Kunstler G, Liancourt**  
198 **P, Tielbörger K, Travis JMJ, Anthelme F, Armas C, Coll L, Corcket E, Delzon S, Forey**  
199 **E, Kikvidze Z, Olofsson J, Pugnaire F, Quiroz CL, Saccone P, Schiffrers K, Seifan M,**  
200 **Touzard B, Michalet R. 2008.** Facilitation in plant communities: the past, the present, and the  
201 future. *Journal of Ecology* **96**:18–34
- 202 **Bruno JF, Stachowicz JJ, Bertness MD. 2003.** Inclusion of facilitation into ecological theory.  
203 *Trends in Ecology & Evolution* **18**:119–125
- 204 **Bulleri F, Bruno J, Silliman B, Stachowicz J. 2016.** Facilitation and the niche: implications for  
205 coexistence, range shifts, and ecosystem functioning. *Functional Ecology* **30**:66–74
- 206 **Butterfield BJ, Bradford JB, Armas C, Prieto I, Pugnaire FI. 2016.** Does the stress-gradient  
207 hypothesis hold water? Disentangling spatial and temporal variation in plant effects on soil  
208 moisture in dryland systems. *Functional Ecology* **30**:10–19



- 209 **Castanho CT, Oliveira AA, Prado PIKL. 2016.** Does extreme environmental severity promote  
210 plant facilitation? An experimental field test in a subtropical coastal dune. *Oecologia* **178**:855–  
211 866
- 212 **Cavieres LA, Hernández-Fuentes C, Sierra-Almeida A, Kikvidze Z. 2016.** Facilitation  
213 among plants as an insurance policy for diversity in Alpine communities. *Functional Ecology*  
214 **30**:52–59
- 215 **de Bello F, Dolezal J, Dvorsky M, Chlumská Z, Reháková K, Klimesová J, Klimes L. 2011.**  
216 Cushions of *Thylacospermum caespitosum* (Caryophyllaceae) do not facilitate other plants  
217 under extreme altitude and dry conditions in the north-west Himalayas. *Annals of Botany*  
218 **108**:67–573
- 219 **Eckersley LK, Scrosati RA. 2012.** Temperature, desiccation, and species performance trends  
220 along an intertidal elevation gradient. *Current Development in Oceanography* **5**:59–73
- 221 **Fritz CO, Morris PE, Richler JJ. 2012.** Effect size estimates: current use, calculations, and  
222 interpretation. *Journal of Experimental Psychology* **141**:2–18
- 223 **He Q, Bertness MD. 2014.** Extreme stresses, niches, and positive species interactions along  
224 stress gradients. *Ecology* **95**:1437–1443
- 225 **He Q, Bertness MD, Altieri AH. 2013.** Global shifts towards positive species interactions with  
226 increasing environmental stress. *Ecology Letters* **16**:695–706
- 227 **Holmgren M, Gómez-Aparicio L, Quero JL, Valladares F. 2012.** Non-linear effects of  
228 drought under shade: reconciling physiological and ecological models in plant communities.  
229 *Oecologia* **169**:293–305
- 230 **Holmgren M, Scheffer M. 2010.** Strong facilitation in mild environments: the stress gradient  
231 hypothesis revisited. *Journal of Ecology* **98**:1269–1275
- 232 **Howell DC. 2002.** *Statistical Methods for Psychology*. Pacific Grove: Duxbury.
- 233 **Koyama A, Tsuyuzaki S. 2013.** Facilitation by tussock-forming species on seedling  
234 establishment collapses in an extreme drought year in a post-mined *Sphagnum* peatland.  
235 *Journal of Vegetation Science* **24**:473–483

- 236 **Longtin CM, Scrosati RA, Whalen GB, Garbary DJ. 2009.** Distribution of algal epiphytes  
237 across environmental gradients at different scales: intertidal elevation, host canopies, and host  
238 fronds. *Journal of Phycology* **45**:820–827
- 239 **López RP, Squeo FA, Armas C, Kelt DA, Gutiérrez JR. 2016.** Enhanced facilitation at the  
240 extreme end of the aridity gradient in the Atacama desert: a community-level approach.  
241 *Ecology* **97**:1593–1604
- 242 **Lortie CJ, Filazzola A, Sotomayor DA. 2016.** Functional assessment of animal interactions  
243 with shrub-facilitation complexes: a formal synthesis and conceptual framework. *Functional*  
244 *Ecology* **30**:41–51
- 245 **Maestre FT, Callaway RM, Valladares F, Lortie CJ. 2009.** Refining the stress-gradient  
246 hypothesis for competition and facilitation in plant communities. *Journal of Ecology* **97**:199–  
247 205
- 248 **Menge BA, Branch GM. 2001.** Rocky intertidal communities. In: Bertness MD, Gaines SD,  
249 Hay ME, eds. *Marine community ecology*. Sunderland: Sinauer, 221–251.
- 250 **Michalet R, Brooker RW, Cavieres LA, Kikvidze Z, Lortie L, Pugnaire FI, Valiente-**  
251 **Banuet A, Callaway RM. 2006.** Do biotic interactions shape both sides of the humped-back  
252 model of species richness in plant communities? *Ecology Letters* **9**:767–773
- 253 **Michalet R, Le Bagousse-Pinguet Y, Maalouf P, Lortie CJ. 2014.** Two alternatives to the  
254 stress-gradient hypothesis at the edge of life: the collapse of facilitation and the switch from  
255 facilitation to competition. *Journal of Vegetation Science* **25**:609–613
- 256 **Michalet R, Pugnaire FI. 2016.** Facilitation in communities: underlying mechanisms,  
257 community and ecosystem implications. *Functional Ecology* **30**:3–9
- 258 **Pugnaire FI, Armas C, Maestre FT. 2011.** Positive plant interactions in the Iberian Southeast:  
259 mechanisms, environmental gradients, and ecosystem function. *Journal of Arid Environments*  
260 **75**:1310–1320
- 261 **Raffaelli D, Hawkins S. 1999.** *Intertidal Ecology*. London: Chapman & Hall.
- 262 **Ruttan A, Filazzola A, Lortie CJ. 2016.** Shrub-annual facilitation complexes mediate insect  
263 community structure in arid environments. *Journal of Arid Environments* **134**:1–9

- 264 **Soliveres S, Smit C, Maestre FT. 2015.** Moving forward on facilitation research: response to  
 265 changing environments and effects on the diversity, functioning and evolution of plant  
 266 communities. *Biological Reviews* **90**:297–313
- 267 **Watt CA, Scrosati RA. 2013.** Regional consistency of intertidal elevation as a mediator of  
 268 seaweed canopy effects on benthic species richness, diversity, and composition. *Marine*  
 269 *Ecology Progress Series* **491**:91–99
- 270 **Watt CA, Scrosati RA. 2014.** Experimental and mensurative data on the abundance of primary  
 271 producers and consumers from rocky intertidal habitats in Atlantic Canada. *Ecology* **95**:1429  
 272

272

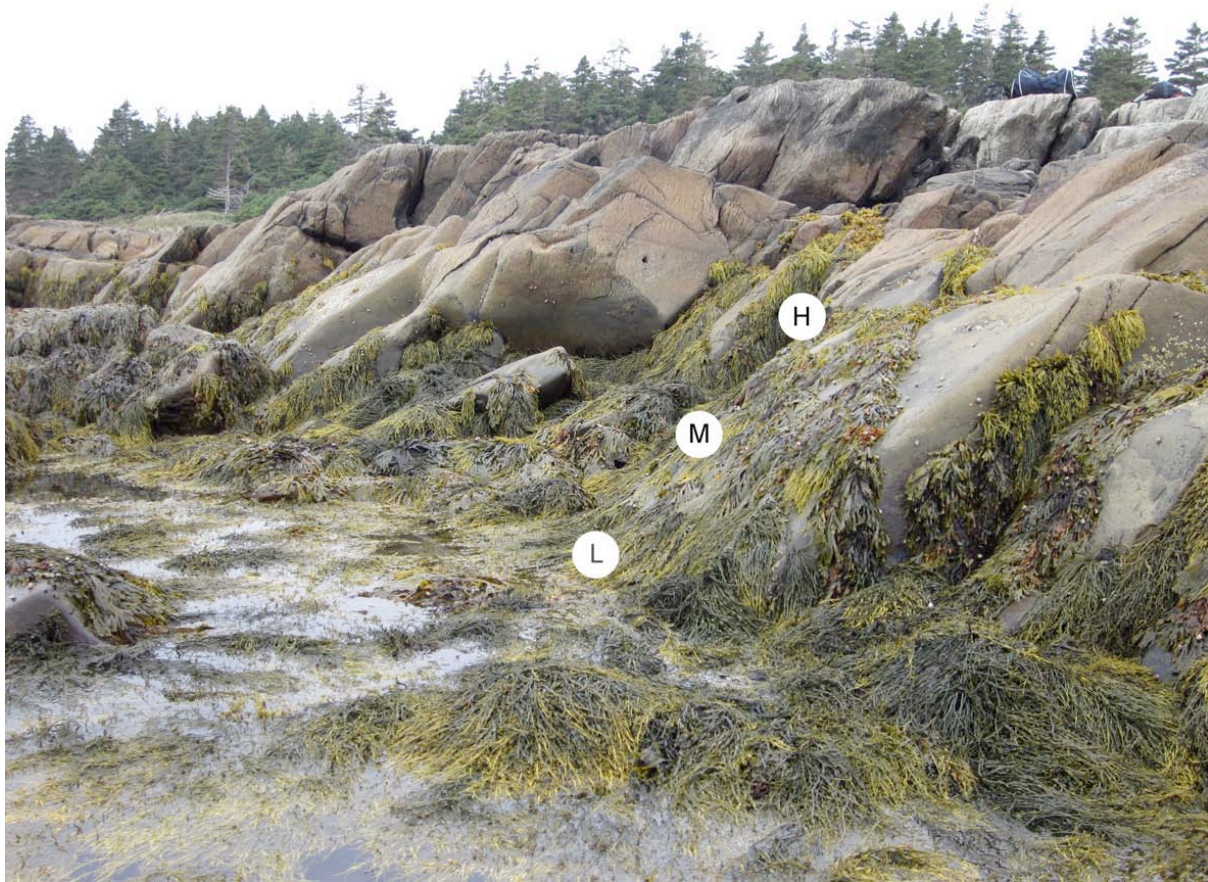

273

274

275 **Figure 1. Wave-sheltered rocky intertidal habitat from the Atlantic coast of Nova Scotia.**

276 This view at low tide shows the extensive cover of fucoid algal canopies at high (H), middle (M),

277 and low (L) elevations. Picture taken by Ricardo A. Scrosati.

278

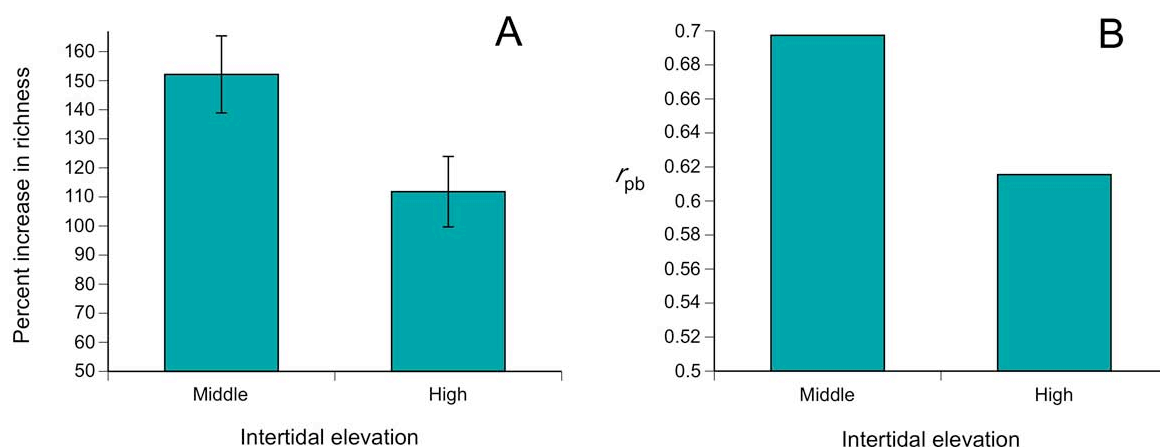

**Figure 2. Community-level facilitation by fucoid algal canopies.** (A) Percent increase in benthic species richness between quadrats with low and high canopy cover (facilitation intensity; mean  $\pm$  SE) at middle and high intertidal elevations. (B) Point-biserial correlation coefficients ( $P < 0.001$  in both cases) used to calculate the importance of facilitation at middle and high elevations. Both descriptors of facilitation differed significantly between middle and high elevations (see Results for details).
